## 14 **Abstract**

15 **Introduction:** With the widely used technique of One Lung Ventilation (OLV) in  
16 patients throughout thoracic surgery, it's unclear whether inhaled or intravenous  
17 anesthetics were associated with postoperative complications. The purpose of the current  
18 study is to compare the effects of intravenous and inhaled anesthetics on the postoperative  
19 complications within the patients suffering OLV.

20 **Methods:** We searched the related randomized controlled trials in  
21 PubMed\EMBASE\Medline and the Cochrane library up to 09\2021. Inclusive criteria  
22 were as follows: We included all the randomized controlled trials which compared the  
23 effects of intravenous and inhaled anesthetics on the postoperative complications [listed as:  
24 (a) major complications; (b) postoperative pulmonary complications (PPCs); (c)  
25 postoperative cognitive function (MMSE score); (d) length of hospital stay; (e) 30-days  
26 mortality] for the patients undergoing one lung ventilation.

27 **Results:** Thirteen randomized controlled trials with 2522 patients were included for  
28 analysis. Overall, there were no significant differences in the postoperative major  
29 complications between inhaled and intravenous anesthetics groups (OR 0.78, 95%CI 0.54  
30 to 1.13,  $p=0.19$ ;  $I^2=0\%$ ). However, more PPCs were detected in intravenous groups when  
31 compared to inhaled groups (OR 0.62, 95%CI 0.44 to 0.87,  $p=0.005$ ;  $I^2=37\%$ ). Both the  
32 postoperative MMSE scores (SMD -1.94, 95%CI -4.87 to 0.99,  $p=0.19$ ;  $I^2=100\%$ ) and the  
33 length of hospital stay (SMD 0.05, 95%CI -0.29 to 0.39,  $p=0.76$ ;  $I^2=73\%$ ) were  
34 comparable between two groups. Besides, the 30-day mortality didn't differ significantly  
35 across groups either (OR 0.79, 95%CI 0.03 to 18,  $p=0.88$ ;  $I^2=63\%$ ).

36 **Conclusions:** In patients undergoing OLV, generous anesthesia with inhaled  
37 anesthetics could reduce PPCs compared with intravenous anesthetics, but no evident  
38 advantages were provided over other major complications, cognitive function, hospital  
39 stay or mortality.

40 **Key words:** Anesthetics, One Lung Ventilation, Complications

## 42 **Introduction**

43 According to the literature, approximately 3% surgical patients develop major  
44 complications, resulting in 0.4% deaths peri-operatively(1). And lung cancer is the leading  
45 reason of cancer-related death in the United States(2). Since one-lung ventilation (OLV)  
46 could facilitate the performance of surgery and prevent contamination of the other lung, it  
47 has become a necessary technique during thoracic surgery(3). However, OLV could cause  
48 ischemia and hypoxia in the nonventilated lung, barotrauma and excessive fluids in the  
49 ventilated lung tissue, and alveolar or even systematic inflammatory responses, thus  
50 increasing the risk of postoperative complications(4). The incidence of postoperative  
51 pulmonary complications (PPCs) is much higher in patients operated with OLV than in  
52 those without OLV(5).

53 Christopher.U et al. found that in cardiac surgery, inhaled anesthesia was associated  
54 with major benefits in outcomes and reduced mortality(6). However, Bassi.A(7) and  
55 Modolo.NS(3) revealed that few evidence from randomized controlled trials(RCTs)  
56 demonstrated significant difference in particular postoperative outcomes between general  
57 anesthesia maintained by inhaled and intravenous anesthetics in case of OLV in 2008 and  
58 2013. Later, several RCTs and systematic reviews suggested that inhalation might  
59 preserve intraoperative cardiac function, reduce PPCs, attenuate local alveolar  
60 inflammatory responses in patients undergoing OLV(8-10).

61 Since 2013, increasing clinical RCTs have been published to explore the distinct  
62 effects of different sedative anesthetics on the major complications in patients with OLV.  
63 Therefore, we conducted this meta-analysis to compare the effects of inhaled anesthetics  
64 (Sevoflurane or Desflurane) and intravenous anesthetic (Propofol) regarding patients'  
65 postoperative outcomes.

67

## 68 **Methods**

69 We followed the recommendation from the Cochrane Handbook for the Systematic  
70 Review(11). And the meta-analysis has been registered on  
71 <https://www.crd.york.ac.uk/prospero/> with No. CRD420202222856.

### 72 **Retrieval strategy**

73 Two authors (JY, QHH) separately searched the Pubmed, Medline, Embase and  
74 Cochrane central register for the relevant RCTs from Jan 1st, 2000 to Sep 31st, 2021. We  
75 used various combinations of the key words and MeSH terms to perform the search. The  
76 search terms were listed as Table 1 and the search was limited to English.

|                                                                                                                                                                                                                                                                        |                         |                            |                             |
|------------------------------------------------------------------------------------------------------------------------------------------------------------------------------------------------------------------------------------------------------------------------|-------------------------|----------------------------|-----------------------------|
| anesthesia, intravenous                                                                                                                                                                                                                                                | anesthetics, inhalation | one lung ventilation       | RCT                         |
| intravenous anesthesia                                                                                                                                                                                                                                                 | anesthetic gases        | single lung ventilation    | Randomized controlled trial |
| intravenous anesthetics                                                                                                                                                                                                                                                | inhalation anesthetics  | Ventilation, One-Lung      | Controlled clinical trial   |
| intravenous anesthetic agent                                                                                                                                                                                                                                           | inhalation anesthesia   | Ventilation, Single-Lung   | Randomized                  |
| propofol                                                                                                                                                                                                                                                               | inhaled anesthesia      | lung separation techniques | Randomly                    |
| Diprivan                                                                                                                                                                                                                                                               | volatile anesthetics    | Separation Technique, Lung | Trial                       |
| Disoprofol                                                                                                                                                                                                                                                             | sevoflurane             | Technique, Lung Separation |                             |
|                                                                                                                                                                                                                                                                        | sevorane                | Lobectomy                  |                             |
|                                                                                                                                                                                                                                                                        | desflurane              | thoracic surgery           |                             |
|                                                                                                                                                                                                                                                                        | isoflurane              |                            |                             |
| We used Boolean operator “OR” to search every potentially eligible article that was relevant to Intravenous anesthetics/ Inhaled anesthetics/ One lung ventilation. Then, we used the operator “AND” to combine the above results to accomplish the screening process. |                         |                            |                             |
| Table 1 The specific keywords and MeSH terms during the screening process                                                                                                                                                                                              |                         |                            |                             |

77

### 78 **Inclusion criteria**

79 (1) Population: Patients (>18 years old) were scheduled for elective thoracic surgery under  
80 OLV.

81 (2) Intervention: Patients receiving anesthesia maintained with inhaled anesthetics when  
82 OLV.

83 (3) Comparison: Patients receiving intravenous anesthetics like propofol to maintain the  
84 anesthesia when OLV.

85 (4) Outcomes:

86 The primary endpoint was the number of major complications assessed by Clavien-  
87 Dindo score (grade III to V) or not (complications needs more intensive treatments  
88 including overall cardiac events, myocardial infarction, acute renal failure, hepatic failure,  
89 disseminated intravascular coagulation, extrapulmonary infection, gastrointestinal failure,  
90 coma).

91 The secondary endpoints were the number of PPCs (hypoxemia, acute respiratory  
92 distress syndrome, pulmonary infiltrates, pneumonia, pleural effusions, atelectasis,  
93 pneumothorax, bronchospasm, cardiopulmonary edema, aspiration pneumonitis); scores of  
94 Mini-mental State Examination (MMSE), length of hospital stay and 30-day mortality  
95 after OLV.

96 (5) Study: Randomized controlled studies.

97 Any trials reported the familiar Population, Intervention, Comparison, Studies, and at  
98 least one outcome as listed before were included.

## 99 **Exclusion criteria**

100 Duplicated studies, nonhuman or pediatric studies, conference abstracts, studies  
101 published before the 2000s, and the studies which data could not be extracted.

## 102 **Data extraction**

103 Based on the criteria above, two authors (JY, QHH) sequentially enrolled the trials  
104 and extracted the data independently: publication information (first author's name,  
105 publication year), characteristics of participants (sample size, type of surgery, anesthesia  
106 induction schemes, duration of OLV and surgery, OLV strategies) and outcomes  
107 information. Disagreements over eligibility between the two researchers were resolved by  
108 discussion. If necessary, the third researcher (RC) was involved and adjudicated. The data  
109 were extracted or calculated from figures using the program Engauge Digitizer 5.1 if  
110 necessary (M. Mitchell, Engauge Digitizer, <http://digitizer.sourceforge.net>). All the  
111 extracted data were collected in the standardized Excel file by the two authors, and YC  
112 double-checked the accuracy.

## 113 **Risk of Bias Assessment and Strength of Evidence**

114 Two reviewers (JY, QHH) independently employed the method recommended by  
115 Cochrane Collaboration to assess the methodological quality of included trials. For each  
116 trial, the criteria used for quality assessment were random sequence generation, allocation  
117 concealment, performance bias, detection bias, attribution bias, reporting bias, and others.

118 Each criterion is classified as "yes", "no" or "unclear", and the brief assessment for each  
119 trial were classified as three levels (low risk of bias, unclear risk of bias and high risk of  
120 bias). The Grading of Recommendations, Assessment, Development and Evaluations  
121 approach (GRADEpro; [gdt.gradepro.org](http://gdt.gradepro.org)) was approved to rating the overall quality of  
122 evidence for each outcome. In the approach, each outcome began as high-quality  
123 evidence, but may be rated down by one or more of five categories of limitations: risk of  
124 bias, inconsistency, indirectness, imprecision, and reporting bias. Finally, the approach  
125 drew an evident quality of each outcome as low, moderate or high.

## 126 **Statistical Analysis**

127 According to DerSimonian and Laird method performed by Review Manager 5.3  
128 (RevMan, The Cochrane Collaboration, Oxford, UK), differences were expressed as risk  
129 ratio (RR) with 95% confidence intervals (CI) for dichotomous data, and the differences  
130 between continuous data were expressed as mean differences (MDs) or standardized mean  
131 differences (SMD) with 95% CI. Due to the limited number and heterogeneity between  
132 included studies, the Hartung-Knapp-Sidik-Jonkman (HKSJ) method were further  
133 conducted for random effects to the data pooled by less than 5 trials, or the value of  
134 heterogeneity was more than 50%. Since Joanna(12) had proved that HKSJ method were  
135 outperformed than DerSimonian-Laird method for the meta-analysis among limited  
136 number studies or high heterogeneity.

137 The heterogeneity between pooled studies was represented by  $I^2$  value, and the  
138 criteria to identify whether the combined data being high or low heterogeneity was 50%.  
139 On account of the inconsistency of the surgery process, method of anesthesia, time of  
140 OLV and the factors which increased the heterogeneity, random effects model was  
141 conducted for significant heterogeneity ( $I^2 > 50\%$ ,  $p \leq 0.1$ ). And sensitivity analyses were  
142 implied to explore the possible explanation for the high heterogeneity too.

## 144 **Results**

### 145 **Study Identification**

146 The search yielded 1945 publications by the original screening. Based on the inclusion  
147 and exclusion criteria, 1319 potentially eligible trials were excluded based on the title or  
148 abstract. Within the full text screening we excluded 46 studies (10 articles were not RCT,  
149 19 studies did not match the population criteria, 9 compared intravenous anesthetics to  
150 regional anesthesia or other drugs, and 9 studies did not report any outcome as listed  
151 before). Finally, we included 13 studies and meta-analyzed the data(13-25). The flow  
152 chart was presented in Fig.1.

### 153 **Study Characteristics and Quality**

154 The main characteristics of the included trials were depicted in Table 2. The  
155 13studies(13-25) included 2522 patients, which published from 2000 to 2021. As showed  
156 in Figure.2, 8(13, 15-20) out of 14 studies presented a low risk of random sequence  
157 generation and allocation concealment by describing the randomized method in detail.  
158 Although 6(14, 17, 21-24) out of 14 failed to report the details of blinding to participants  
159 or outcome evaluators, the outcomes were little influenced by the lack of blinding.  
160 According to the GRADEpro system, the quality of every outcome were showed in Table  
161 3. The evidence quality of PPCs was high, and the evidence quality of major  
162 complications, 30-days mortality and hospital stay were moderate. However, the evidence  
163 of MMSE score was low.

| Trial                     | Surgery                      | Intervention(n=1263)        |                                                            | Control(n=1259)                         |                                                    | OLV strategy                                                                                                                            | Outcome                                                                                     |
|---------------------------|------------------------------|-----------------------------|------------------------------------------------------------|-----------------------------------------|----------------------------------------------------|-----------------------------------------------------------------------------------------------------------------------------------------|---------------------------------------------------------------------------------------------|
|                           |                              | Induction                   | Maintenance                                                | Induction                               | Maintenance                                        |                                                                                                                                         |                                                                                             |
| Beck-Schimmer<br>2016(13) | Lung surgery                 | Desflurane(n=230)           |                                                            | Propofol(n=230)                         |                                                    | Vt <sup>c</sup> 4-6 ml/kg<br>FIO <sub>2</sub> <sup>d</sup> 0.6-1.0<br>PEEP <sup>e</sup> 5cmH <sub>2</sub> O                             | Complications<br>(Clavien-Dindo<br>classification),<br>Hospital stay                        |
|                           |                              | Etomidate<br>(0.3-0.5mg/kg) | Desflurane<br>(end-tidal<br>concentrations of<br>4.5-7%)   | Etomidate<br>(0.3-0.5 mg/kg)            | Propofol<br>TCI <sup>b</sup> (2-6ug/ml)            |                                                                                                                                         |                                                                                             |
| Conno<br>2009(14)         | Lung surgery                 | Sevoflurane (n=27)          |                                                            | Propofol(n=27)                          |                                                    | Vt <sup>c</sup> 6-7ml/kg<br>FiO <sub>2</sub> <sup>d</sup> 1.0                                                                           | PPCs,<br>Hospital death                                                                     |
|                           |                              | Propofol<br>(1.5-2.5mg/kg)  | sevoflurane<br>(1 MAC <sup>a</sup> )                       | Propofol<br>TCI <sup>b</sup> (3-5ug/ml) | Propofol<br>TCI <sup>b</sup> (1 MAC <sup>a</sup> ) |                                                                                                                                         |                                                                                             |
| Gala<br>2017(15)          | Lung<br>resection<br>surgery | Sevoflurane(n=86)           |                                                            | Propofol(n=88)                          |                                                    | Vt <sup>c</sup> 6ml/kg<br>FiO <sub>2</sub> <sup>d</sup> 0.6-1.0<br>PEEP <sup>e</sup> 5cmH <sub>2</sub> O                                | Complications<br>(Clavien-Dindo<br>classification),<br>PPCs,<br>Mortality,<br>Hospital stay |
|                           |                              | Propofol<br>(2-3mg/kg)      | Sevoflurane<br>(BIS <sup>f</sup> 40-60)                    | Propofol<br>(2-3mg/kg)                  | Propofol<br>(BIS <sup>f</sup> 40-60)               |                                                                                                                                         |                                                                                             |
| Egawa<br>2016(16)         | Lung surgery                 | Sevoflurane(n=72)           |                                                            | Propofol(n=72)                          |                                                    | Vt <sup>c</sup> 5-6ml/kg<br>FiO <sub>2</sub> <sup>d</sup> 1.0<br>PEEP <sup>e</sup> 4-5cmH <sub>2</sub> O                                | MMSE score                                                                                  |
|                           |                              | Propofol<br>(1-2mg/kg)      | Sevoflurane<br>(BIS <sup>f</sup> 40-60)                    | Propofol<br>TCI <sup>b</sup> (3-4ug/ml) | Propofol<br>(BIS <sup>f</sup> 40-60)               |                                                                                                                                         |                                                                                             |
| Lee<br>2012(17)           | Ivor Lewis<br>operation      | Sevoflurane(n=24)           |                                                            | Propofol(n=24)                          |                                                    | Vt <sup>c</sup> 6ml/kg<br>FIO <sub>2</sub> <sup>d</sup> (achieve<br>oxygen saturation<br>>95%)<br>PEEP <sup>e</sup> 5cmH <sub>2</sub> O | Hospital complications,<br>PPCs,<br>Hospital death,<br>Hospital stay                        |
|                           |                              | Thiopental<br>(4-5 mg/kg)   | Sevoflurane<br>(end-tidal<br>concentrations of 1-<br>2.5%) | Propofol<br>(BIS <sup>f</sup> 30-50)    | Propofol<br>(BIS <sup>f</sup> 30-50)               |                                                                                                                                         |                                                                                             |
| Li<br>2021(18)            | Lung surgery                 | Sevoflurane(n=169)          |                                                            | Propofol(n=167)                         |                                                    | Vt <sup>c</sup> 6ml/kg<br>FiO <sub>2</sub> <sup>d</sup> 0.4-0.5<br>PEEP <sup>e</sup> 5-8cmH <sub>2</sub> O                              | Complications (Clavien-<br>Dindo classification),<br>PPCs,<br>Death,                        |
|                           |                              | Propofol<br>(1.5-2.5mg/kg)  | Sevoflurane<br>(BIS <sup>f</sup> 40-60)                    | Propofol<br>(1.5-2.5mg/kg)              | Propofol<br>(BIS <sup>f</sup> 40-60)               |                                                                                                                                         |                                                                                             |
| Mahmoud                   | Lung surgery                 | Isoflurane(n=25)            |                                                            | Propofol(n=25)                          |                                                    | Vt <sup>c</sup> 10ml/kg                                                                                                                 | PPCs,                                                                                       |



|                      |                           |                           |                                           |                                       |                                         |                                                                                                           |                                                             |
|----------------------|---------------------------|---------------------------|-------------------------------------------|---------------------------------------|-----------------------------------------|-----------------------------------------------------------------------------------------------------------|-------------------------------------------------------------|
| 2011(19)             |                           | Propofol<br>(1.5-2 mg/kg) | Isoflurane<br>(1MAC <sup>a</sup> )        | Propofol<br>(1.5-2 mg/kg)             | Propofol<br>(4-6mg /kg/h)               | FiO <sub>2</sub> <sup>d</sup> 0.8-1.0<br>PEEP <sup>e</sup> 5cmH <sub>2</sub> O                            | 30-mortality,<br>Hospital stay                              |
| Potočnik<br>2014(20) | Thoracic<br>surgery       | Sevoflurane(n=17)         |                                           | Propofol(n=19)                        |                                         | Vt <sup>c</sup> 4ml/kg<br>FiO <sub>2</sub> <sup>d</sup> 0.6-0.7<br>PEEP <sup>e</sup> 3 cmH <sub>2</sub> O | PPCs,<br>Hospital death                                     |
|                      |                           | Sevoflurane (6<br>%)      | Sevoflurane<br>(2-2.5%)                   | Propofol<br>(1.5-2.0 mg/kg)           | Propofol<br>(4-6 mg/kg/h)               |                                                                                                           |                                                             |
| Shen<br>2011(21)     | Thoracic<br>surgery       | Sevoflurane (n=30)        |                                           | Propofol(n=30)                        |                                         | Vt <sup>c</sup> 8ml/kg<br>FiO <sub>2</sub> <sup>d</sup> 0.6                                               | MMSE score                                                  |
|                      |                           | Sevoflurane<br>(4-6%)     | Sevoflurane<br>(0.8-1.2MAC <sup>a</sup> ) | Propofol<br>(1.5-2 mg/kg)             | Propofol<br>(6-8mg /kg/h)               |                                                                                                           |                                                             |
| Tian<br>2017(22)     | Lobectomy                 | Sevoflurane(n=31)         |                                           | Propofol(n=31)                        |                                         | Not reported                                                                                              | Adverse reaction,<br>MMSE score                             |
|                      |                           | Sevoflurane<br>(8%)       | Sevoflurane<br>(2%)                       | Propofol<br>(1mg/kg)                  | Propofol<br>(6mg/kg)                    |                                                                                                           |                                                             |
| Wang<br>2019(23)     | Lung surgery              | Sevoflurane(n=32)         |                                           | Propofol(n=26)                        |                                         | Vt <sup>c</sup> 8-10ml/kg<br>FiO <sub>2</sub> <sup>d</sup> 1.0                                            | MMSE score                                                  |
|                      |                           | Sevoflurane<br>(6%)       | Sevoflurane<br>(1MAC <sup>a</sup> )       | Propofol<br>TCI <sup>b</sup> (3ug/kg) | Propofol<br>TCI <sup>b</sup> (4ug/kg)   |                                                                                                           |                                                             |
| Xu<br>2014(24)       | Open-chest<br>thoracotomy | Sevoflurane(n=20)         |                                           | Propofol(n=20)                        |                                         | Vt <sup>c</sup> 8ml/kg<br>FiO <sub>2</sub> <sup>d</sup> 1.0                                               | Complications,<br>PPCs,<br>Hospital death,<br>Hospital stay |
|                      |                           | Sevoflurane<br>(8%)       | Sevoflurane<br>(BIS <sup>f</sup> 40-60)   | Propofol<br>TCI <sup>b</sup> (6ug/ml) | Propofol<br>(BIS <sup>f</sup> 40-60)    |                                                                                                           |                                                             |
| Yu<br>2017(25)       | Thoracic<br>surgery       | Sevoflurane(n=500)        |                                           | Propofol(n=500)                       |                                         | Vt <sup>c</sup> 8ml/kg                                                                                    | MMSE score                                                  |
|                      |                           | Sevoflurane<br>(2-4%)     | Sevoflurane<br>(BIS <sup>f</sup> 45-55)   | Propofol<br>(2mg/kg)                  | Sevoflurane<br>(BIS <sup>f</sup> 45-55) |                                                                                                           |                                                             |

Table 2. Trial Characteristics

MAC<sup>a</sup>: minimum alveolar concentration; TCI<sup>b</sup>: target controll infusion; Vt<sup>c</sup>: tidal volume; FiO<sub>2</sub><sup>d</sup>: Fraction of inspiration O<sub>2</sub>; PEEP<sup>e</sup>: positive end expiratory pressure; BIS<sup>f</sup>: bispectral index

165 Table 3: The details of GRADE evidence among each outcome

| Certainty assessment |              |              |               |              |             |                      | № of patients       |                         | Effect            |                   | Certainty | Importance |
|----------------------|--------------|--------------|---------------|--------------|-------------|----------------------|---------------------|-------------------------|-------------------|-------------------|-----------|------------|
| № of studies         | Study design | Risk of bias | Inconsistency | Indirectness | Imprecision | Other considerations | Inhaled anesthetics | Intravenous anesthetics | Relative (95% CI) | Absolute (95% CI) |           |            |

major complications

| Certainty assessment                  |                   |              |               |              |             |                      | № of patients       |                         | Effect                            |                                                                   | Certainty        | Importance |
|---------------------------------------|-------------------|--------------|---------------|--------------|-------------|----------------------|---------------------|-------------------------|-----------------------------------|-------------------------------------------------------------------|------------------|------------|
| № of studies                          | Study design      | Risk of bias | Inconsistency | Indirectness | Imprecision | Other considerations | Inhaled anesthetics | Intravenous anesthetics | Relative (95% CI)                 | Absolute (95% CI)                                                 |                  |            |
| 5                                     | randomised trials | not serious  | not serious   | not serious  | serious     | none                 | 60/542 (11.1%)      | 74/541 (13.7%)          | <b>OR 0.78</b><br>(0.54 to 1.18)  | <b>27 fewer per 1,000</b><br>(from 58 fewer to 21 more)           | ⊕⊕⊕○<br>Moderate |            |
| <b>PPCs</b>                           |                   |              |               |              |             |                      |                     |                         |                                   |                                                                   |                  |            |
| 7                                     | randomised trials | not serious  | not serious   | not serious  | not serious | none                 | 80/381 (21.0%)      | 113/382 (29.6%)         | <b>OR 0.62</b><br>(0.44 to 0.87)  | <b>89 fewer per 1,000</b><br>(from 140 fewer to 28 fewer)         | ⊕⊕⊕⊕<br>High     |            |
| <b>MMSE scores</b>                    |                   |              |               |              |             |                      |                     |                         |                                   |                                                                   |                  |            |
| 5                                     | randomised trials | serious      | serious       | not serious  | not serious | none                 | 665                 | 659                     | -                                 | <b>SMD 1.94</b><br><b>SD lower</b><br>(4.87 lower to 0.99 higher) | ⊕⊕○○<br>Low      |            |
| <b>Mortality (follow-up: 30 days)</b> |                   |              |               |              |             |                      |                     |                         |                                   |                                                                   |                  |            |
| 5                                     | randomised trials | not serious  | serious       | not serious  | not serious | none                 | 3/335 (0.9%)        | 4/335 (1.2%)            | <b>OR 0.79</b><br>(0.03 to 18.00) | <b>2 fewer per 1,000</b><br>(from 12 fewer to 167 more)           | ⊕⊕⊕○<br>Moderate |            |
| <b>Length of hospital stay</b>        |                   |              |               |              |             |                      |                     |                         |                                   |                                                                   |                  |            |
| 5                                     | randomised trials | not serious  | serious       | not serious  | not serious | none                 | 385                 | 387                     | -                                 | <b>SMD 0.05</b><br><b>higer</b><br>(0.29 lower to 0.39 higher)    | ⊕⊕⊕○<br>Moderate |            |

## **1. The primary outcome: major postoperative complications**

Five studies(13, 15, 17, 18, 24) assessed the major complications post-surgery including 1083 patients, among which fixed effects model showed that there have no significantly difference between intravenous or inhaled anesthetics groups (OR 0.78, 95%CI 0.54 to 1.13,  $p=0.19$ ;  $I^2=0$ , Fig.3.).

## **2. The second outcomes:**

### **2.1 PPCs**

Seven RCTs(14, 15, 17-20, 24) compared the effect of intravenous and inhaled anesthetics on PPCs in 763 patients with OLV. The fixed effects model depicted that compared to intravenous anesthetics, inhaled anesthetics significantly reduced the number of patients who had PPCs with low heterogeneity (OR 0.62, 95%CI 0.44 to 0.87,  $p=0.005$ ;  $I^2=37%$ , Fig.4.).

### **2.2 Postoperative MMSE scores**

As Fig.5. showed, five RCTs(16, 21-23, 25) estimated the postoperative cognitive function after OLV through MMSE scores in 1324 patients. The pooled data concluded that anesthetics barely have effect on MMSE scores (SMD -1.94, 95%CI -4.87 to 0.99,  $p=0.19$ ;  $I^2=100%$ ). In terms of the extremely high heterogeneity, sensitivity analysis and HKSJ method were further conducted to strength the outcome. Nonetheless, we failed to obtain the original heterogeneity study by removing any individual trials and HKSJ method reached the same conclusion as before (SMD -1.94, 95%CI -5.11 to 1.23,  $p=0.16$ ).

### **2.3 Length of hospital stay**

Data for the length of hospital stay were extracted from five trials(13, 15, 17, 19, 24) with 772 patients. Fig.6. revealed that the types of anesthetics were not associated with significant differences in the length of hospital stay at all (SMD 0.05, 95%CI -0.29 to 0.39,  $p=0.76$ ;  $I^2=73%$ , Fig.6.). Sensitivity analysis detected that Mahmoud 2011(19) contributed to the total heterogeneity. After removing this study, the pooled data outlined that the patients in the intravenous group spent significantly less time in hospital (SMD 0.19; 95 % CI 0.05 to 0.34,  $p= 0.01$ ;  $I^2=0$ ) compared with patients in the inhaled group. However, HKSJ method strength the conclusion that anesthetics were not related to the length of hospital stay after excluded the Mahmoud 2011 and depicted the instability of result above (SMD 0.19, 95%CI -0.04 to 0.42,  $p=0.07$ ).

### **2.4 30-days mortality**

Two out of five studies(15, 17-19, 24) which intended to assess the mortality within 30 days after surgery and found that there has no difference in 30-days mortality between two groups (SMD 0.79, 95%CI 0.03 to 1.8,  $p=0.88$ ;  $I^2=63\%$ , Fig.7.).

## Discussion

In the present analysis, we included 13 eligible trials(13-25) with 2522 patients who underwent OLV to illustrate that compared to intravenous anesthetics, inhaled anesthetics were associated with fewer risk of PPCs with the high evidence evaluated by GRADEpro system. However, different types of anesthetics had no significantly different effect on the major complications, postoperative MMSE scores, length of hospital stay or 30-days mortality.

According to the meta-analysis accomplished by Uhlig et.al(6), general anesthesia with inhaled anesthetics was associated with the reduction of major complications and mortality in cardiac surgery, which might possibly due to the cardioprotective properties of volatile anesthetics through coronary vasodilation and reduced stress responses(26). Similarly, Uhlig(6) concluded that total inhaled anesthetics seemed to be associated with less benefits in major complications, mortality, length of hospital stay compared to intravenous anesthetics in noncardiac surgery. Even though, studies had demonstrated that the anti-inflammatory effects of volatile anesthetics affected other organs like lungs, brain, kidneys and liver in virto(27-29). In terms of patients receiving noncardiac surgery (including thoracic, vascular and abdominal surgery), major complications, length of hospital stay and mortality might be more relevant to types of surgery, characteristic of patients, different standardized operating procedures rather than types of anesthetics. Thus, the systematic organ protection of inhaled anesthetics was diluted for the patients undergoing OLV that we discussed.

As far as we are concerned, inhaled anesthetics interferes with hypoxic pulmonary vasoconstriction (HPV), and causes hypoxemia when used at a minimum alveolar concentration greater than one when OLV(30). However, Prakash(31) observed that volatile agents had a direct effect on bronchial smooth muscle and contributed to bronchodilation, which acted with lower pressures and greater Cdyn in cases of OLV when compared with propofol. Thus, there are both advantages and disadvantages of inhaled anesthetics on the pulmonary function when OLV.

Regarding to inflammatory responses in vitro(32) or in vivo(33), inhaled anesthetics significantly reduced inflammatory responses to lung injury, contributing to immunomodulatory and organ protective effects. In case of the clinical surgery proceeded with OLV, inhaled anesthetics were found to play anti-inflammatory role by acting on the cytokine responses, ischaemia-reperfusion and oxidative stress(15, 34). Besides, meta-

analysis concluded that compared with total intravenous anesthesia, total inhaled anesthesia could reduce the alveolar inflammatory responses but had no significantly effect on the systematic inflammatory responses in the meantime(10), which may contribute to the results that inhaled agents have a benefit effect on the incidence of PPCs rather than the other systematically complications.

Given the report by International Perioperative Neurotoxicity Working Group, few evidence is detected on which particular anesthetic is preferable to postoperative cognitive function in general anesthesia(35). Trials have proved that cerebral oxygenation saturation is associated with postoperative cognitive dysfunction(36), and OLV is relevant to a definite reduction in partial pressure of oxygen when compared to baseline as well(37). Moreover, trials revealed that oxygenation index were higher in intravenous anesthetics groups compared to inhaled group within the first 30 minutes after OLV(8). However, in consistent with the Working Group's Recommendation, we found postoperative cognitive function screening (MMSE scores) were still comparable between two groups after OLV. The reasons may lay in that MMSE screening tool is insufficient to measure cognitive function, and the following time of included trials may be not long enough due to postoperative cognitive dysfunction may last for weeks to months. More importantly, desaturation was rare in all participants, which may offset the different effect of anesthetics on cognitive function.

We came across several limitations through the analysis. First, not all included trials applied Clavien-Dindo score to assess major complications systematically in which complications were analyzed with 0 to 5 different severity grades. Due to limited published articles, to reduce the risk of bias as far as possible, the postoperative events are defined as the events that need more intensive treatments. Second, only two included trials reported the rate of mortality. The mortality is relatively low and affected more by multi-factors than anesthetics alone. Thus, the conclusion may be referenced with consideration. Next, parts of data we acquired was transferred from median/range or graph. Although the method we chose was used commonly, the data was not completely original and may add to the risk of error rate. Finally, we limited the language to English, which may increase the risk of publication bias. Thus, as two Cochrane Meta-analysis recommended(3, 7), if researchers doubted the prognosis of different anesthetics when OLV, they should design and carry out more high-quality and large-scaled trials to assess the standardized outcomes in the future.

## Conclusion

For the patients suffering OLV, compared to intravenous anesthetics, inhaled anesthetics showed significantly protective effects on the PPCs, but not on the postoperative major complications, cognitive function, hospital stay or 30-days mortality either. Further studies are required to test and verify the conclusion.

### Key messages

- Comparing to propofol, inhaled anesthetics provided protective effects over postoperative pulmonary complications for the patients undergoing OLV.
- No significantly advantages were observed on the other major complications, cognitive function, hospital stay or 30-days mortality between different anesthetics when OLV.

## REFERENCEUncategorized References

1. Weiser TG, Regenbogen SE, Thompson KD, Haynes AB, Lipsitz SR, Berry WR, et al. An estimation of the global volume of surgery: a modelling strategy based on available data. *Lancet*. 2008;372(9633):139-44.
2. Jemal A, Center MM, DeSantis C, Ward EM. Global patterns of cancer incidence and mortality rates and trends. *Cancer Epidemiol Biomarkers Prev*. 2010;19(8):1893-907.
3. Módolo NS, Módolo MP, Marton MA, Volpato E, Monteiro Arantes V, do Nascimento Junior P, et al. Intravenous versus inhalation anaesthesia for one-lung ventilation. *Cochrane Database Syst Rev*. 2013;2013(7):Cd006313.
4. Bernasconi F, Piccioni F. One-lung ventilation for thoracic surgery: current perspectives. *Tumori*. 2017;103(6):495-503.
5. Canet J, Gallart L, Gomar C, Paluzie G, Valles J, Castillo J, et al. Prediction of postoperative pulmonary complications in a population-based surgical cohort. *Anesthesiology*. 2010;113(6):1338-50.
6. Uhlig C, Bluth T, Schwarz K, Deckert S, Heinrich L, De Hert S, et al. Effects of Volatile Anesthetics on Mortality and Postoperative Pulmonary and Other Complications in Patients Undergoing Surgery: A Systematic Review and Meta-analysis. *Anesthesiology*. 2016;124(6):1230-45.
7. Bassi A, Milani WR, El Dib R, Matos D. Intravenous versus inhalation anaesthesia for one-lung ventilation. *Cochrane Database Syst Rev*. 2008(2):Cd006313.
8. Pang QY, An R, Liu HL. Effects of inhalation and intravenous anesthesia on intraoperative cardiopulmonary function and postoperative complications in patients undergoing thoracic surgery. *Minerva Anesthesiol*. 2018;84(11):1287-97.
9. Sun B, Wang J, Bo L, Zang Y, Gu H, Li J, et al. Effects of volatile vs. propofol-based intravenous anesthetics on the alveolar inflammatory responses to one-lung ventilation: a meta-analysis of randomized controlled trials. *J Anesth*. 2015;29(4):570-9.
10. Yuan JL, Kang K, Li B, Lu J, Miao MR, Kang X, et al. The Effects of Sevoflurane vs. Propofol for Inflammatory Responses in Patients Undergoing Lung Resection: A Meta-Analysis of Randomized Controlled Trials. *Front Surg*. 2021;8:692734.
11. Moher D, Liberati A, Tetzlaff J, Altman DG, Group P. Preferred reporting items for systematic reviews and meta-analyses: the PRISMA statement. *BMJ*. 2009;339:b2535.
12. IntHout J, Ioannidis JP, Borm GF. The Hartung-Knapp-Sidik-Jonkman method for random effects meta-analysis is straightforward and considerably outperforms the standard DerSimonian-Laird method. *BMC Med Res Methodol*. 2014;14:25.
13. Beck-Schimmer B, Bonvini JM, Braun J, Seeberger M, Neff TA, Risch TJ, et al. Which Anesthesia Regimen Is Best to Reduce Morbidity and Mortality in Lung Surgery?: A Multicenter Randomized Controlled Trial. *Anesthesiology*. 2016;125(2):313-21.
14. De Conno E, Steurer MP, Wittlinger M, Zalunardo MP, Weder W, Schneiter D, et al. Anesthetic-induced improvement of the inflammatory response to one-lung ventilation. *Anesthesiology*. 2009;110(6):1316 - 26.
15. de la Gala F, Piñeiro P, Reyes A, Vara E, Olmedilla L, Cruz P, et al. Postoperative pulmonary complications, pulmonary and systemic inflammatory responses after lung resection surgery with prolonged one-lung ventilation. Randomized controlled trial comparing intravenous and inhalational anaesthesia. *Br J Anaesth*. 2017;119(4):655-63.
16. Egawa J, Inoue S, Nishiwada T, Tojo T, Kimura M, Kawaguchi T, et al. Effects of anesthetics on early postoperative cognitive outcome and intraoperative cerebral oxygen balance in patients undergoing lung surgery: a randomized clinical trial. *Can J Anaesth*. 2016;63(10):1161-9.



17. Lee JJ, Kim GH, Kim JA, Yang M, Ahn HJ, Sim WS, et al. Comparison of pulmonary morbidity using sevoflurane or propofol-remifentanyl anesthesia in an Ivor Lewis operation. *J Cardiothorac Vasc Anesth*. 2012;26(5):857-62.
18. Li XF, Hu JR, Wu Y, Chen Y, Zhang MQ, Yu H. Comparative Effect of Propofol and Volatile Anesthetics on Postoperative Pulmonary Complications After Lung Resection Surgery: a Randomized Clinical Trial. *Anesthesia and analgesia*. 2021.
19. Mahmoud K, Ammar A. Immunomodulatory Effects of Anesthetics during Thoracic Surgery. *Anesthesiol Res Pract*. 2011;2011:317410.
20. Potočnik I, Novak Janković V, Šostarič M, Jerin A, Štupnik T, Skitek M, et al. Antiinflammatory effect of sevoflurane in open lung surgery with one-lung ventilation. *Croat Med J*. 2014;55(6):628-37.
21. Shen YF, Wu JX, Xu MY. Effects of anesthesia with propofol and sevoflurane on postoperative cognitive function of elderly patients undergoing thoracic surgery. *Journal of shanghai jiaotong university (medical science)*. 2011;31(3):322 - 5.
22. Tian HT, Duan XH, Yang YF, Wang Y, Bai QL, Zhang X. Effects of propofol or sevoflurane anesthesia on the perioperative inflammatory response, pulmonary function and cognitive function in patients receiving lung cancer resection. *Eur Rev Med Pharmacol Sci*. 2017;21(23):5515-22.
23. Wang G, Liu J, Gao J, Zheng X. Comparison of the effects of sevoflurane and propofol anesthesia on pulmonary function, MMP-9 and postoperative cognition in patients receiving lung cancer resection. *Oncol Lett*. 2019;17(3):3399-405.
24. Xu WY, Wang N, Xu HT, Yuan HB, Sun HJ, Dun CL, et al. Effects of sevoflurane and propofol on right ventricular function and pulmonary circulation in patients undergone esophagectomy. *International journal of clinical and experimental pathology*. 2014;7(1):272 - 9.
25. Yu W. Anesthesia with propofol and sevoflurane on postoperative cognitive function of elderly patients undergoing general thoracic surgery. *Pak J Pharm Sci*. 2017;30(3(Special)):1107-10.
26. Liu KX, Xia Z. Potential synergy of antioxidant N-acetylcysteine and insulin in restoring sevoflurane postconditioning cardioprotection in diabetes. *Anesthesiology*. 2012;116(2):488-9; author reply 9-90.
27. Yang Q, Dong H, Deng J, Wang Q, Ye R, Li X, et al. Sevoflurane preconditioning induces neuroprotection through reactive oxygen species-mediated up-regulation of antioxidant enzymes in rats. *Anesth Analg*. 2011;112(4):931-7.
28. Kim M, Park SW, Kim M, D'Agati VD, Lee HT. Isoflurane activates intestinal sphingosine kinase to protect against bilateral nephrectomy-induced liver and intestine dysfunction. *Am J Physiol Renal Physiol*. 2011;300(1):F167-76.
29. Kim M, Ham A, Kim JY, Brown KM, D'Agati VD, Lee HT. The volatile anesthetic isoflurane induces ecto-5'-nucleotidase (CD73) to protect against renal ischemia and reperfusion injury. *Kidney Int*. 2013;84(1):90-103.
30. Lederman D, Easwar J, Feldman J, Shapiro V. Anesthetic considerations for lung resection: preoperative assessment, intraoperative challenges and postoperative analgesia. *Ann Transl Med*. 2019;7(15):356.
31. Prakash YS, Iyanoye A, Ay B, Sieck GC, Pabelick CM. Store-operated Ca<sup>2+</sup> influx in airway smooth muscle: Interactions between volatile anesthetic and cyclic nucleotide effects. *Anesthesiology*. 2006;105(5):976-83.
32. Yue T, Roth Z'graggen B, Blumenthal S, Neff SB, Reyes L, Booy C, et al. Postconditioning with a volatile anaesthetic in alveolar epithelial cells in vitro. *Eur Respir J*. 2008;31(1):118-25.

33. Reutershan J, Chang D, Hayes JK, Ley K. Protective effects of isoflurane pretreatment in endotoxin-induced lung injury. *Anesthesiology*. 2006;104(3):511-7.
34. Schilling T, Kozian A, Senturk M, Huth C, Reinhold A, Hedenstierna G, et al. Effects of volatile and intravenous anesthesia on the alveolar and systemic inflammatory response in thoracic surgical patients. *Anesthesiology*. 2011;115(1):65-74.
35. Miles Berger KJS, Charles H. Brown IV, Stacie G. Deiner, Robert A. Whittington, Roderic G. Eckenhoff, and for the Perioperative Neurotoxicity Working Group. Best Practices for Postoperative Brain Health: Recommendations From the Fifth International Perioperative Neurotoxicity Working Group. *Anesth Analg*. 2018. 1406-13 p.
36. Kim J, Shim JK, Song JW, Kim EK, Kwak YL. Postoperative Cognitive Dysfunction and the Change of Regional Cerebral Oxygen Saturation in Elderly Patients Undergoing Spinal Surgery. *Anesth Analg*. 2016;123(2):436-44.
37. Tanaka N, Katoh RI, Yamamoto M, Hoshino K, Morimoto Y, Ito YM, et al. Changes in cerebral oxygen saturation during one-lung ventilation determined using spatially resolved spectroscopy and contributing factors. *J Clin Anesth*. 2020;59:99-100.

**Conflicts of interest.**— The authors certify that there is no conflict of interest with any financial organization regarding the material discussed in the manuscript.

**Funding.**— This research was funded by a grant from Chengdu Municipal Health Commission (No.2020095).

**Authors' contributions:**

Conceptualization: Jing Yang, Qing-Hua Huang, Yu Cui.

Data retrieval: Jing Yang, Qing-Hua Huang.

Project administration: Yu Cui.

Supervision: Rong Cao.

Validation: Rong Cao.

Writing – original draft: Jing Yang, Qing-Hua Huang.

Writing – review and editing: Rong Cao, Yu Cui.

All authors read and approved the final version of the manuscript.

**Abbreviations:**

OLV: one lung ventilation; PPCs: postoperative pulmonary complications; MMSE: Mini-mental State Examination.

## **Titles of figures**

Fig.1 Flow diagram of selecting process

Fig.2 A summary of assessment of risk bias of each RCTs

Fig.3 Forest plot for the number of postoperative major complications between inhaled and intravenous groups

Fig.4 Forest plot for the number of postoperative pulmonary complications between inhaled and intravenous groups

Fig.5 Forest plot for the postoperative MMSE scores between inhaled and intravenous groups

Fig.6 Forest plot for the length of hospital stay between inhaled and intravenous groups

Fig.7 Forest plot for the 30-day mortality between inhaled and intravenous groups

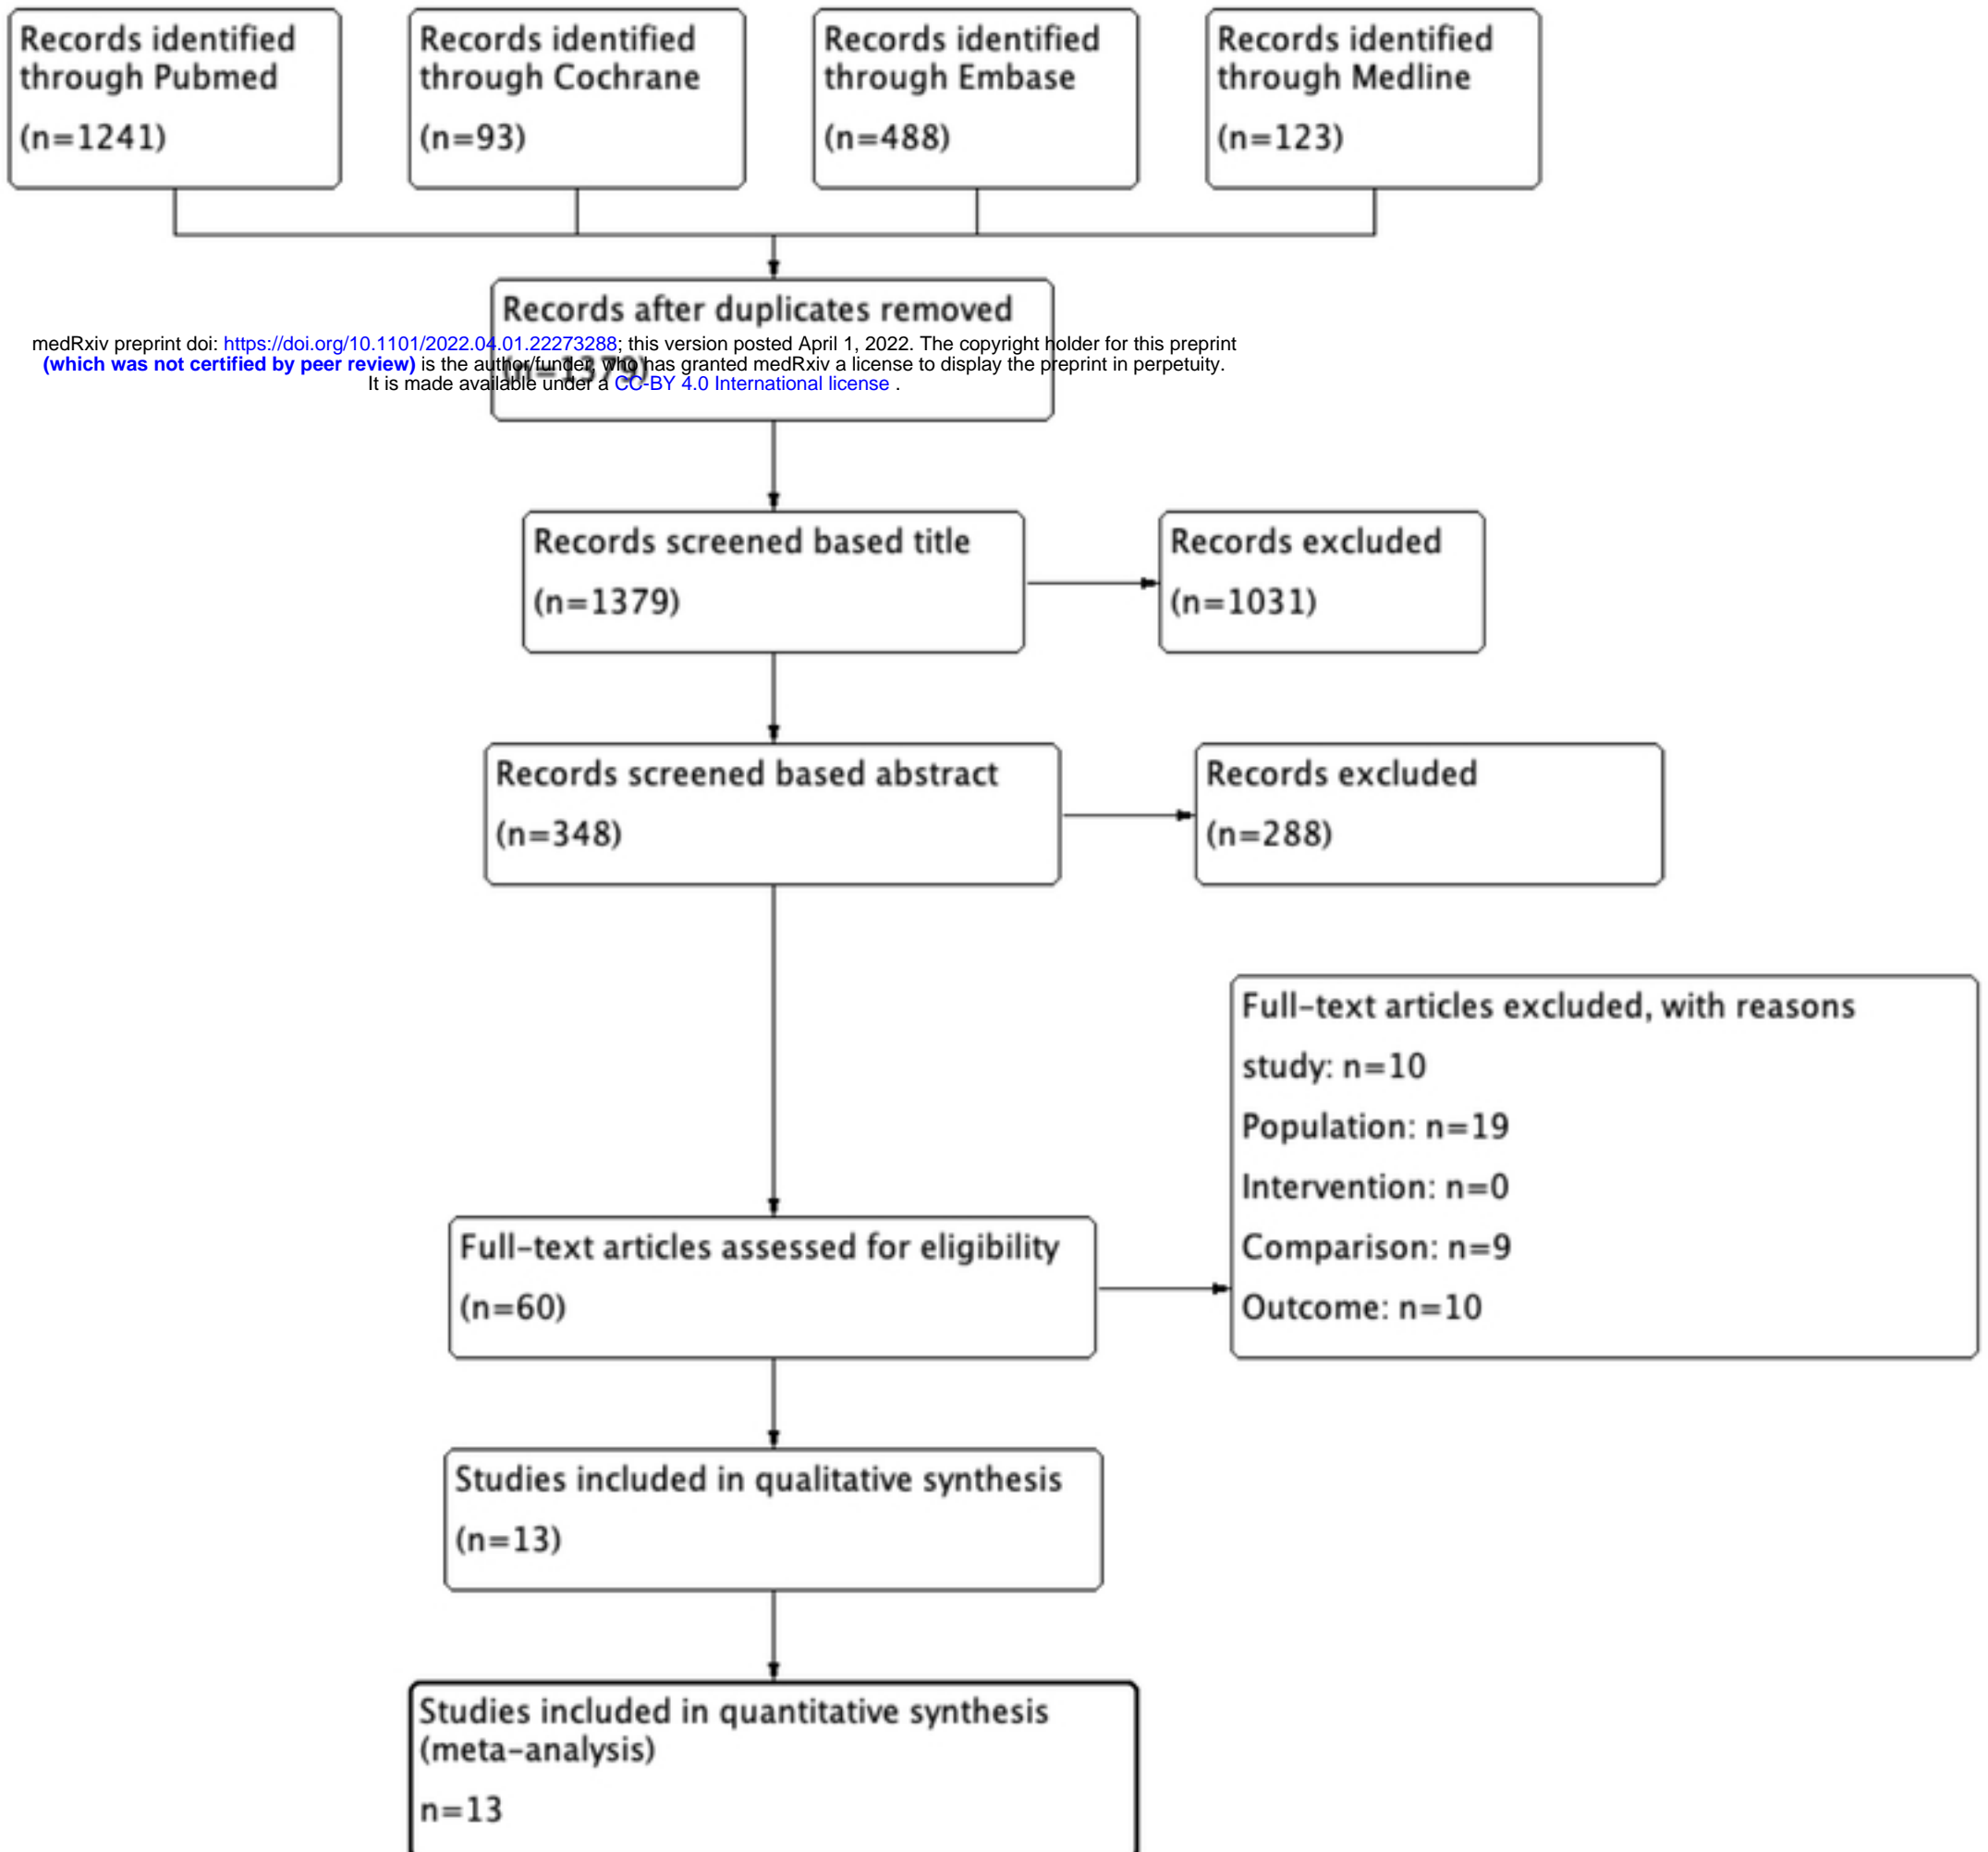

|                    | Random sequence generation (selection bias) | Allocation concealment (selection bias) | Blinding of participants and personnel (performance bias) | Blinding of outcome assessment (detection bias) | Incomplete outcome data (attrition bias) | Selective reporting (reporting bias) | Other bias |
|--------------------|---------------------------------------------|-----------------------------------------|-----------------------------------------------------------|-------------------------------------------------|------------------------------------------|--------------------------------------|------------|
| Beck-Schimmer 2016 | +                                           | +                                       | +                                                         | +                                               | +                                        | ?                                    | +          |
| Conno2009          | ?                                           | ?                                       | ?                                                         | ?                                               | ?                                        | +                                    | +          |
| Egawa 2016         | +                                           | +                                       | +                                                         | +                                               | +                                        | +                                    | +          |
| Gala 2017          | +                                           | +                                       | +                                                         | +                                               | +                                        | +                                    | +          |
| Lee 2012           | +                                           | +                                       | ?                                                         | +                                               | -                                        | +                                    | +          |
| Li 2021            | +                                           | +                                       | +                                                         | +                                               | +                                        | +                                    | +          |
| Mahmoud 2011       | +                                           | +                                       | +                                                         | +                                               | +                                        | +                                    | +          |
| Potocnik 2014      | +                                           | ?                                       | +                                                         | +                                               | +                                        | +                                    | +          |
| Shen 2011          | +                                           | ?                                       | ?                                                         | ?                                               | ?                                        | -                                    | +          |
| Tian 2017          | ?                                           | ?                                       | ?                                                         | ?                                               | +                                        | +                                    | ?          |
| Wang 2019          | ?                                           | ?                                       | ?                                                         | ?                                               | +                                        | +                                    | ?          |
| Xu 2014            | ?                                           | +                                       | ?                                                         | ?                                               | +                                        | +                                    | +          |
| Yu 2017            | ?                                           | +                                       | +                                                         | +                                               | ?                                        | +                                    | ?          |

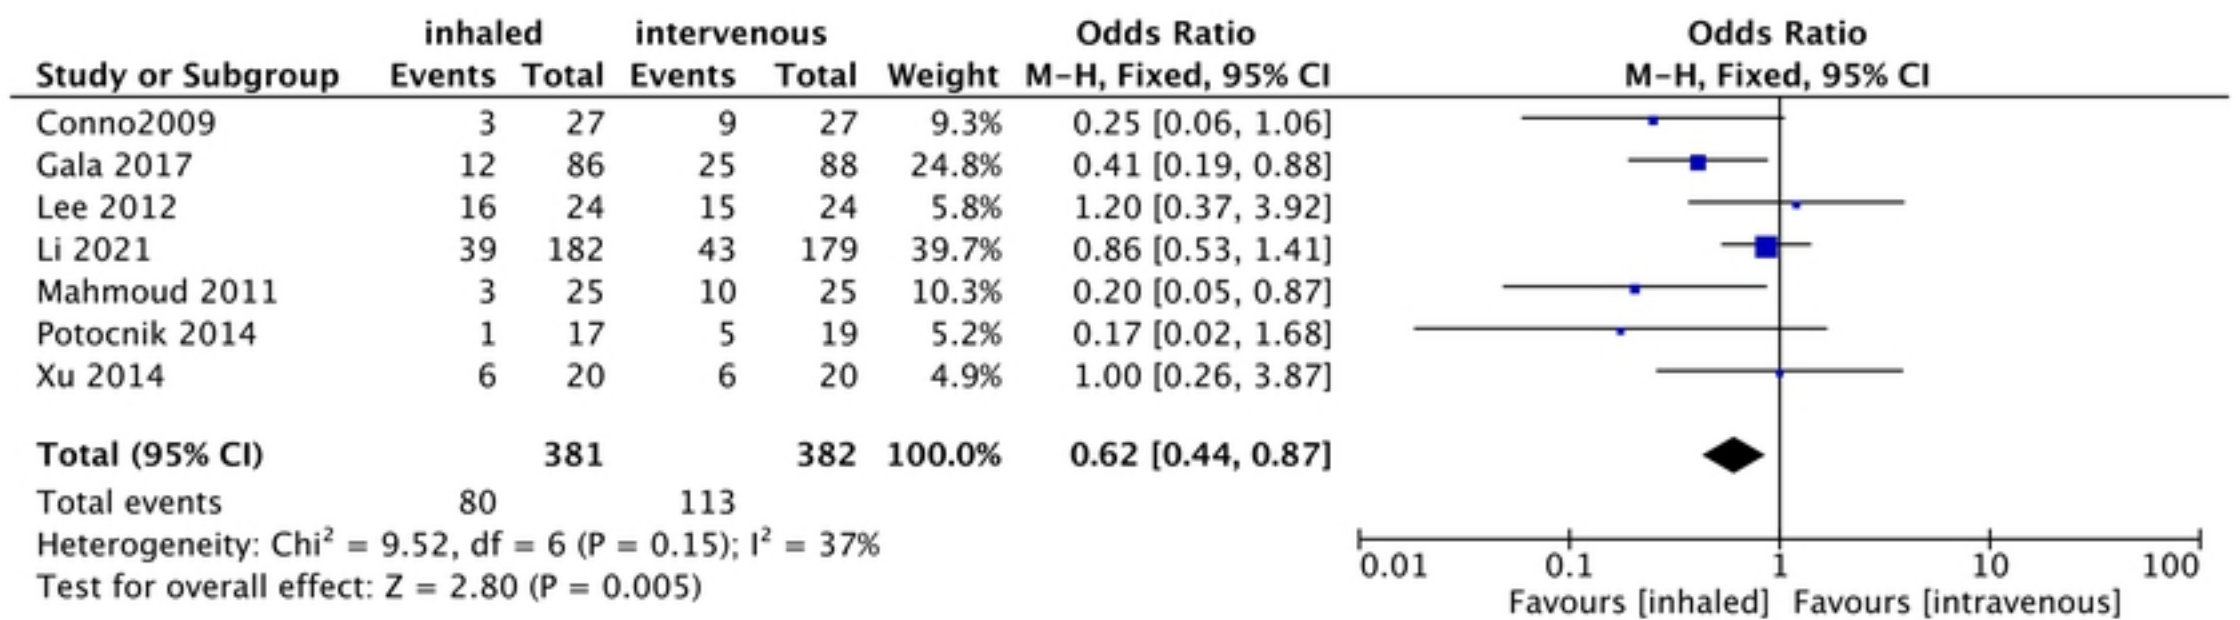



medRxiv preprint doi: <https://doi.org/10.1101/2022.04.01.22273288>; this version posted April 1, 2022. The copyright holder for this preprint (which was not certified by peer review) is the author/funder, who has granted medRxiv a license to display the preprint in perpetuity. It is made available under a [CC-BY 4.0 International license](https://creativecommons.org/licenses/by/4.0/).

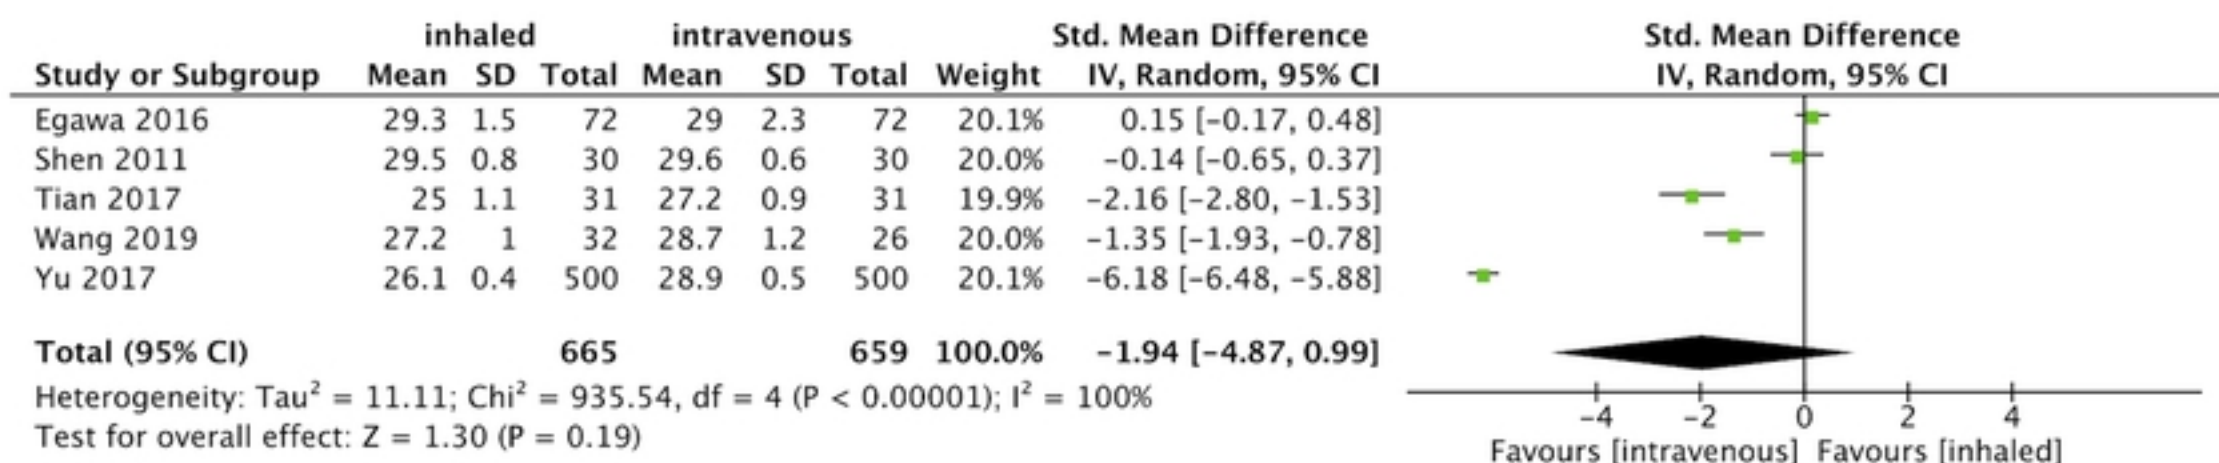

medRxiv preprint doi: <https://doi.org/10.1101/2022.04.01.22273288>; this version posted April 1, 2022. The copyright holder for this preprint (which was not certified by peer review) is the author/funder, who has granted medRxiv a license to display the preprint in perpetuity. It is made available under a [CC-BY 4.0 International license](https://creativecommons.org/licenses/by/4.0/).

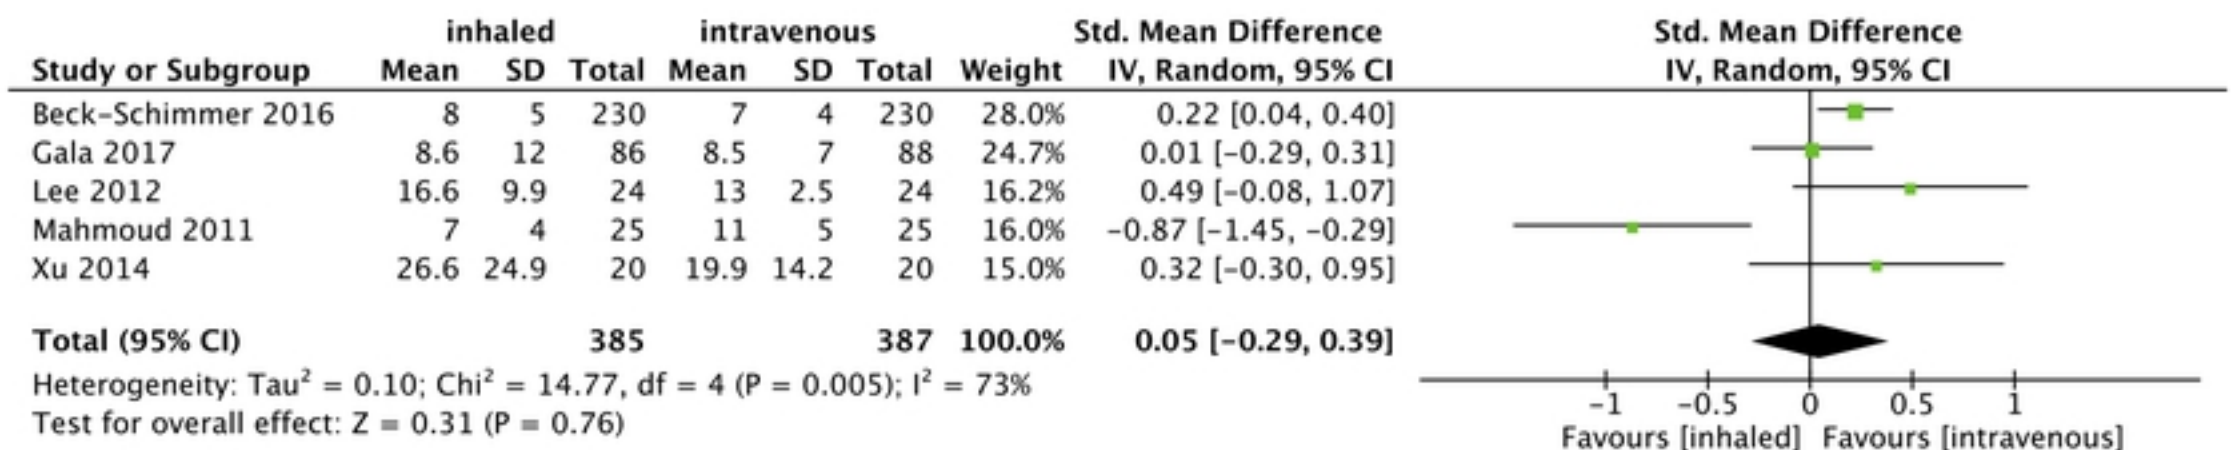



medRxiv preprint doi: <https://doi.org/10.1101/2022.04.01.22273288>; this version posted April 1, 2022. The copyright holder for this preprint (which was not certified by peer review) is the author/funder, who has granted medRxiv a license to display the preprint in perpetuity. It is made available under a [CC-BY 4.0 International license](#).

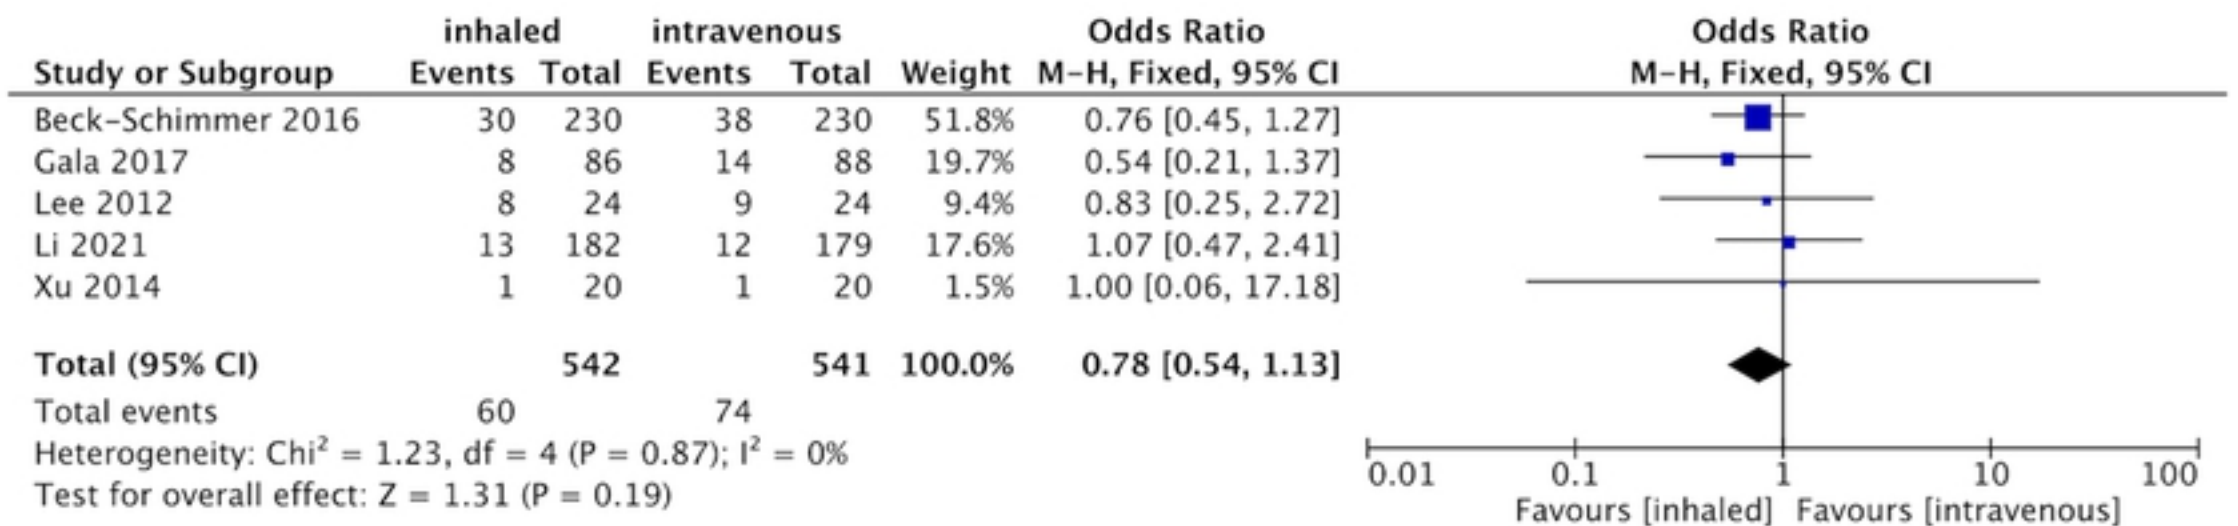

medRxiv preprint doi: <https://doi.org/10.1101/2022.04.01.22273288>; this version posted April 1, 2022. The copyright holder for this preprint (which was not certified by peer review) is the author/funder, who has granted medRxiv a license to display the preprint in perpetuity. It is made available under a [CC-BY 4.0 International license](#).

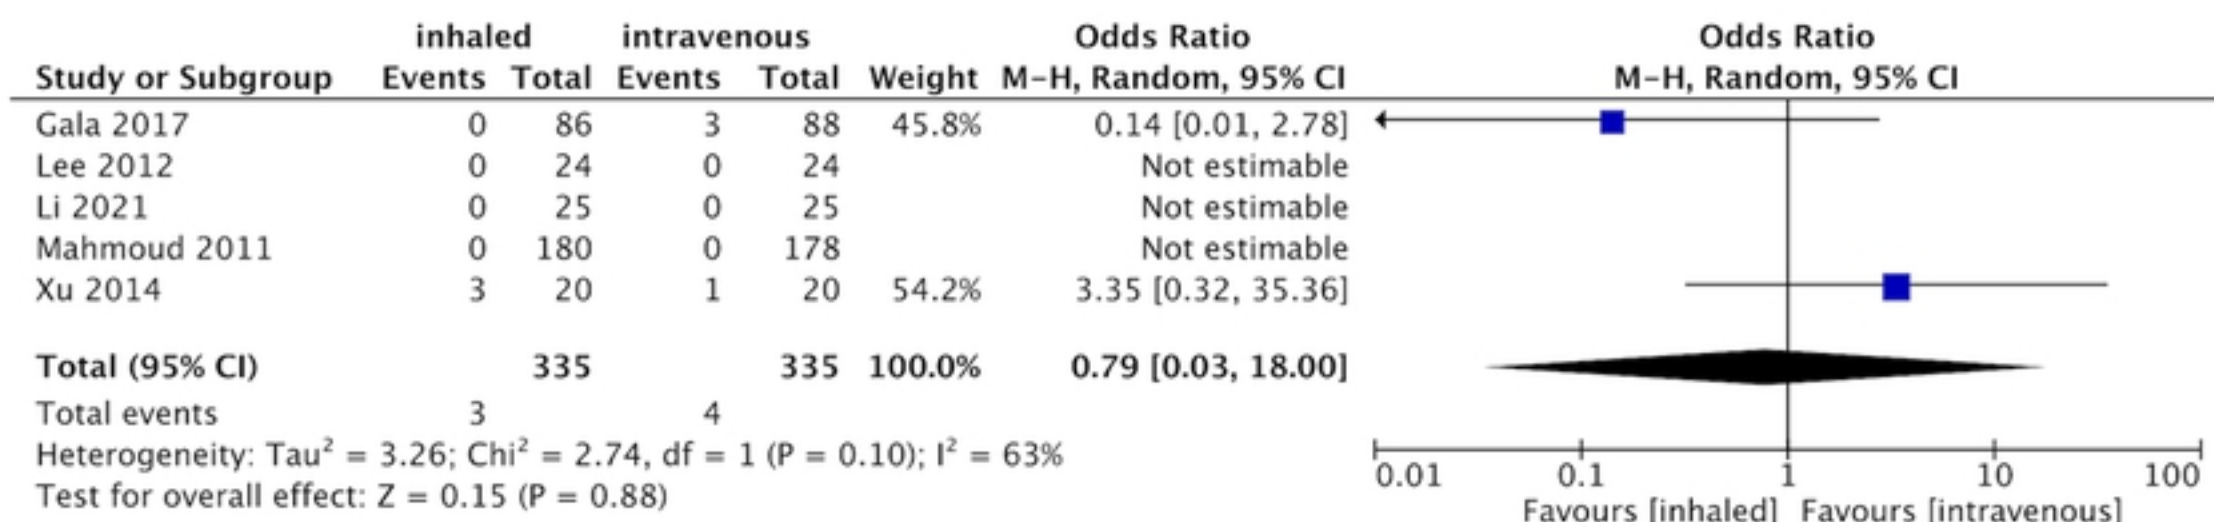

Source: https://medrxiv.org/content/medrxiv/early/2022/04/01/2022.04.01.22273288.full.pdf
